# Supplementary figures and images for: Genotyping Porcine Circovirus 3 (PCV-3) Nowadays: Does It Make Sense?
Source: MDPI journal article supplement (doi:10.3390/v12030265), 2020-02-28

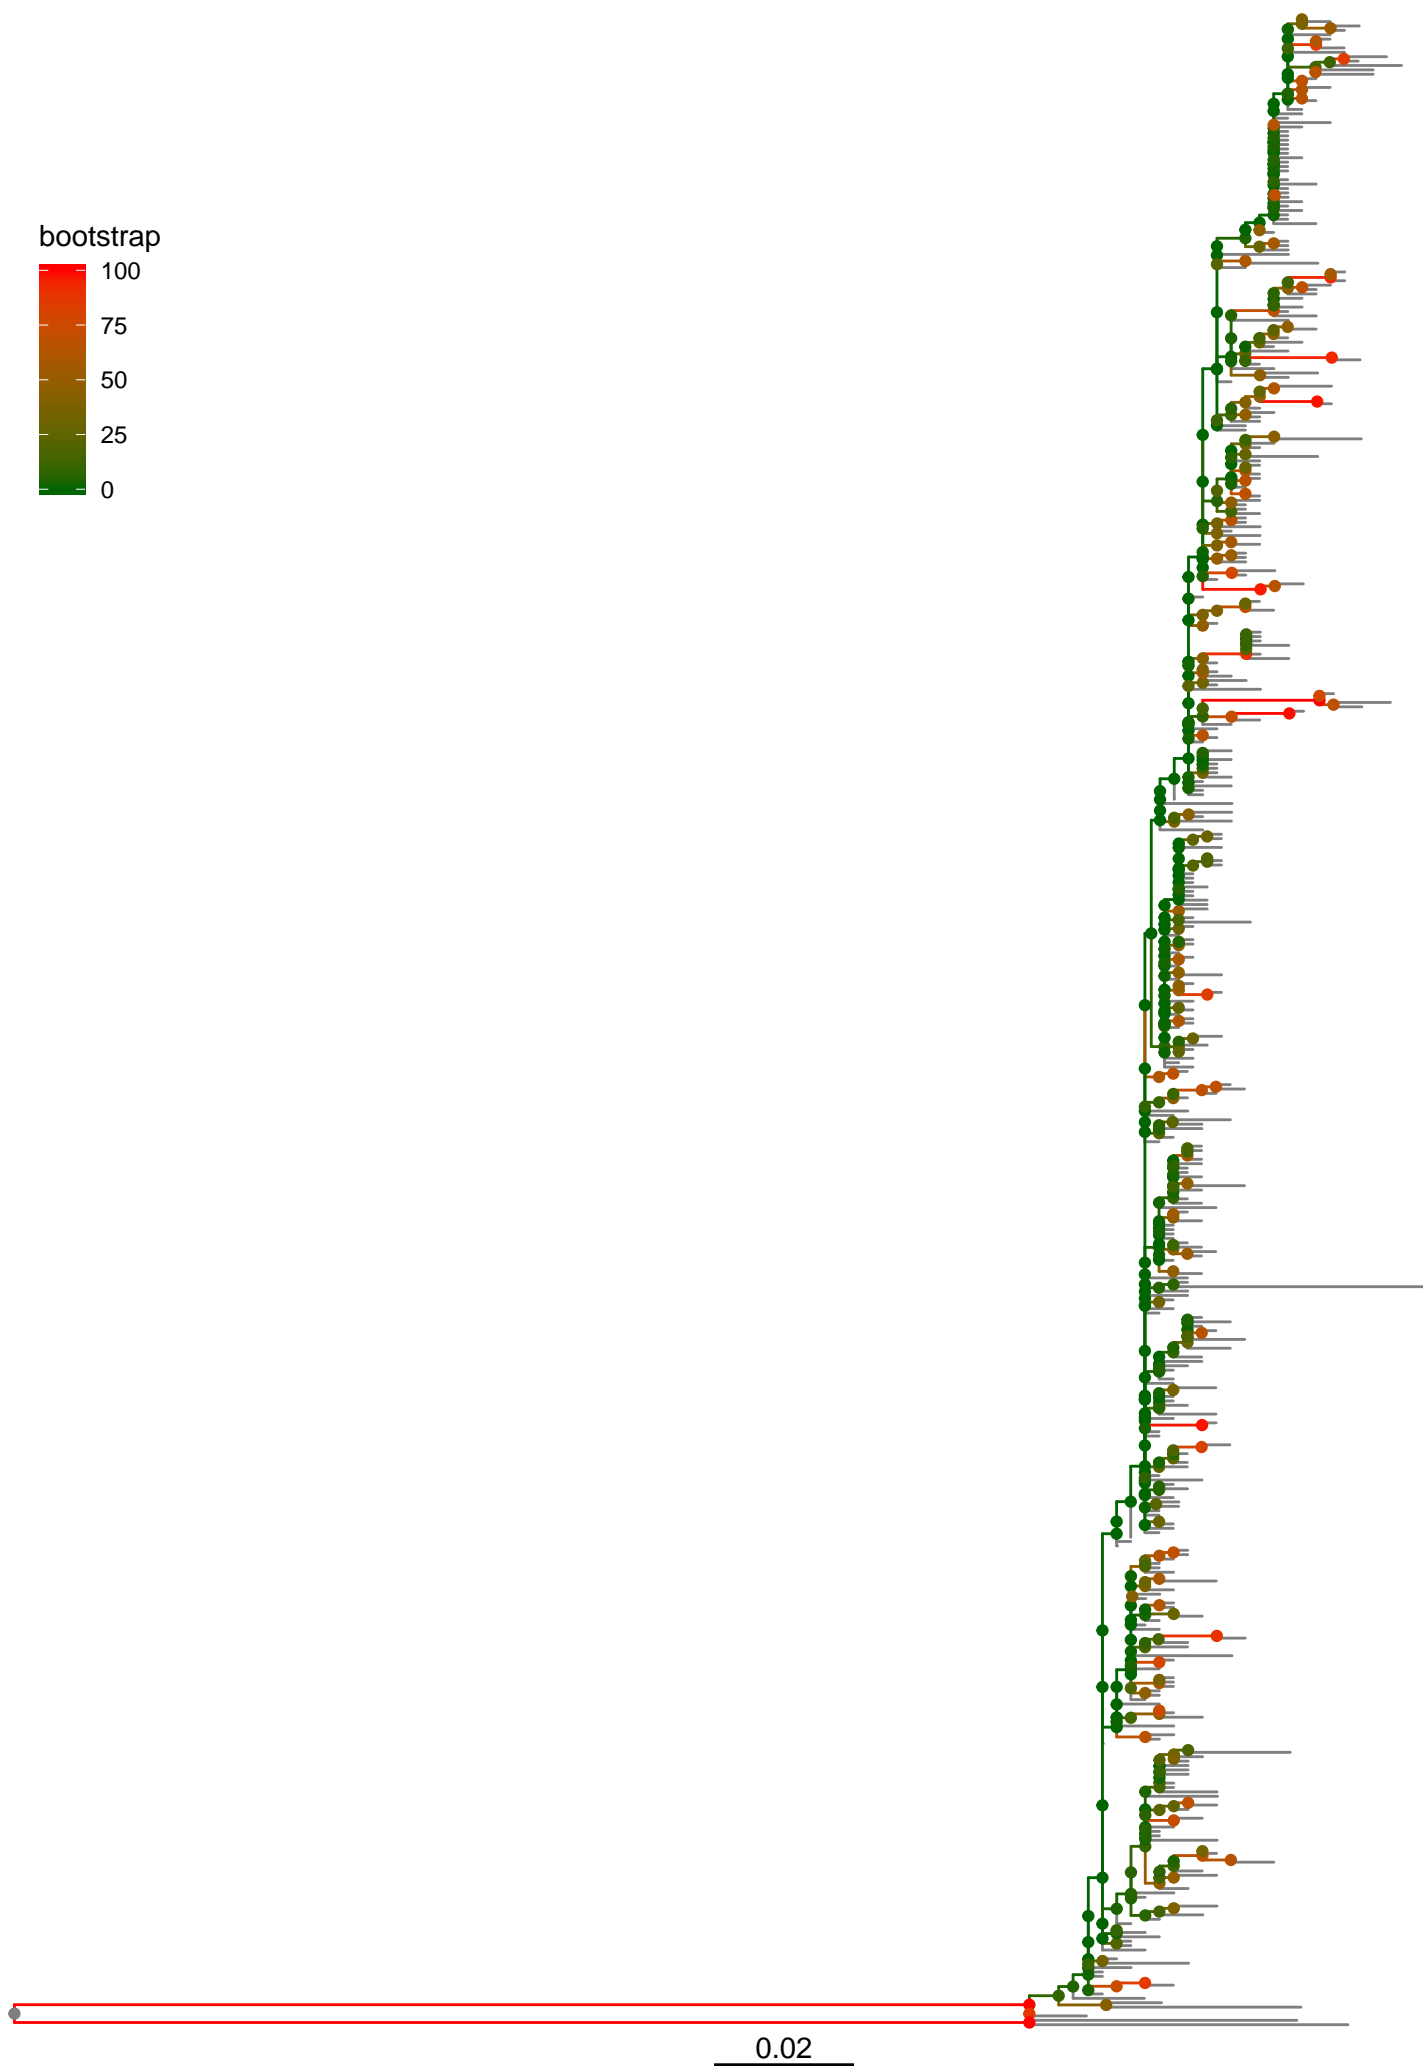

Supplement: s1 [file s1]
